# Supplementary material
Source: HighWire-hosted journal article supplement (https://gut.bmj.com/content/gutjnl-2022-327608)

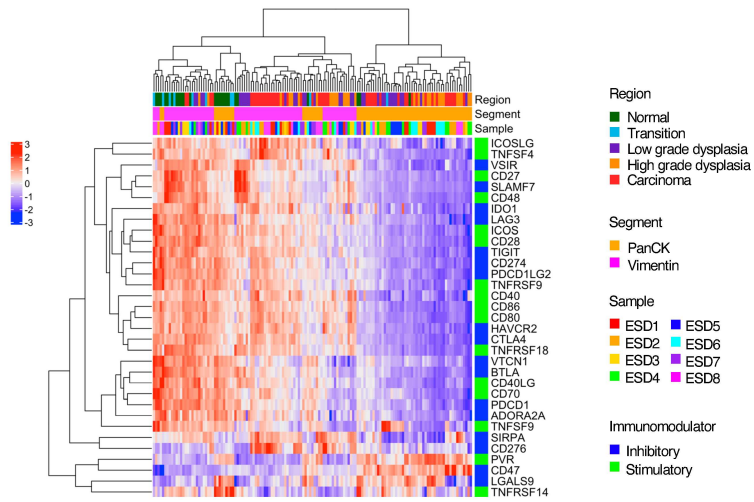

Supplement: inline-supplementary-material-13 [file inline-supplementary-material-13.pdf]
